# Supplementary figures and images for: mTOR/Raptor signaling is critical for skeletogenesis in mice through the regulation of Runx2 expression
Source: PubMed Central journal article supplement — Cell Death Differ. 2017 Jul 7;24(11):1886–99. doi: 10.1038/cdd.2017.110 (PMC5635215; doi:10.1038/cdd.2017.110), 2017-07-07

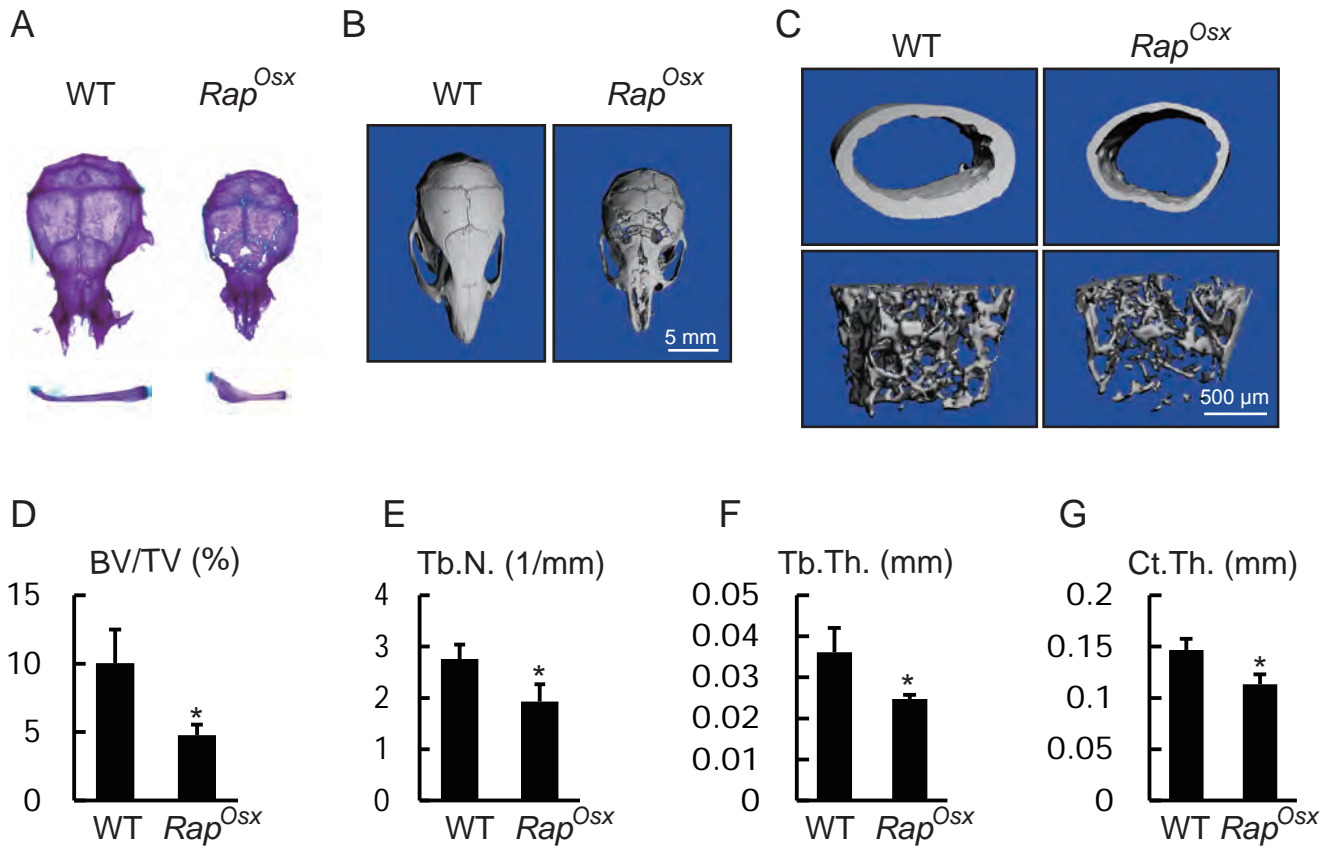

Supplement: cdd2017110x1.pdf [file cdd2017110x1.pdf]

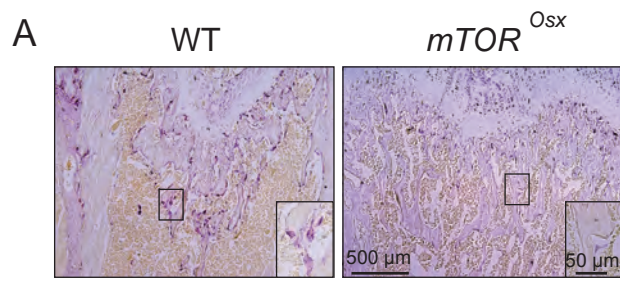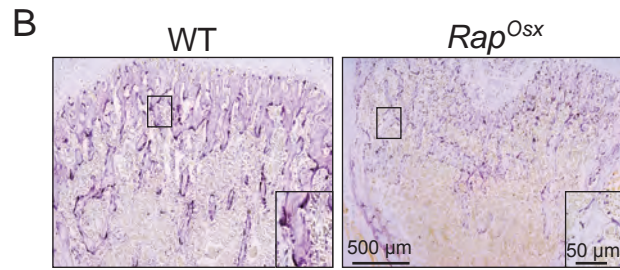

Supplement: cdd2017110x2.pdf [file cdd2017110x2.pdf]

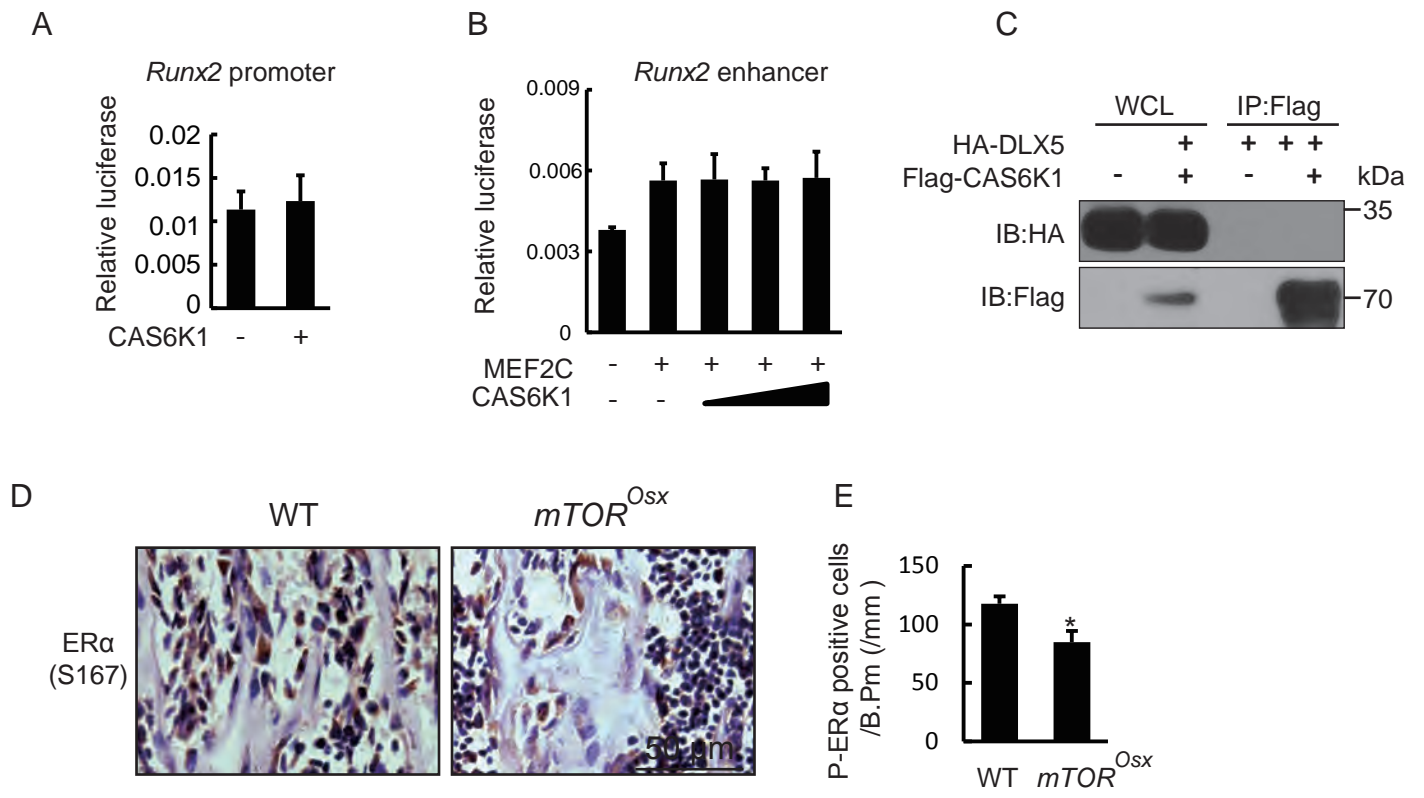

Supplement: cdd2017110x3.pdf [file cdd2017110x3.pdf]
